# Supplementary material
Source: ML conference proceedings conference paper supplement (https://openreview.net/forum?id=rWGd_Licxq)

OLS-sparse oracle-|PA| oracle-PA spaceIV

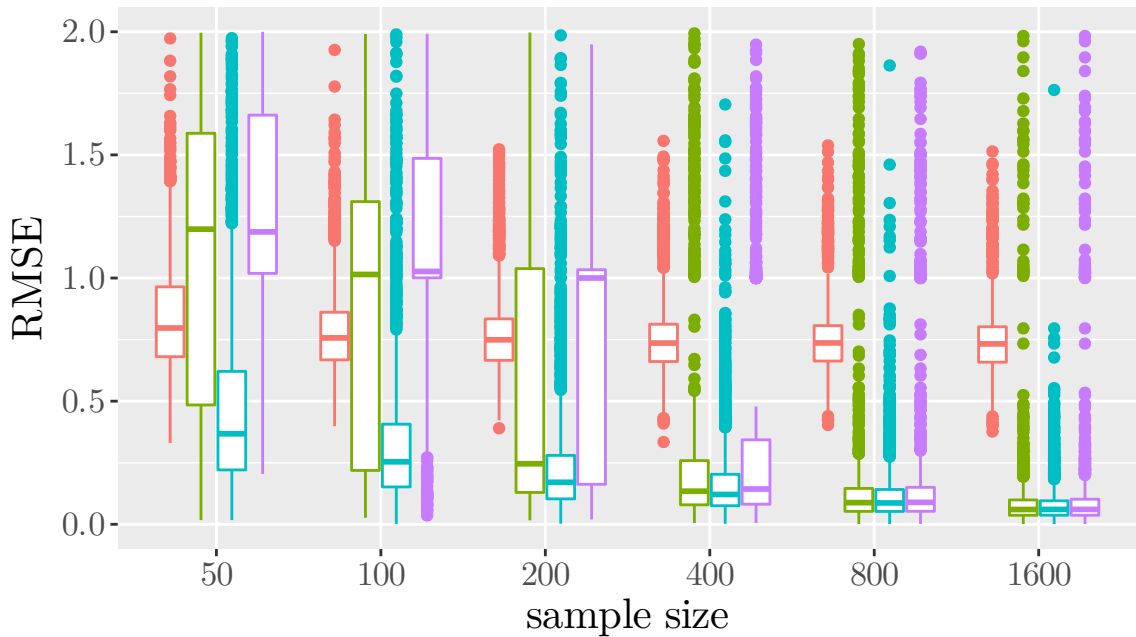

Supplement: supplementary_material [file attachment]

est. prob. sparsity correct

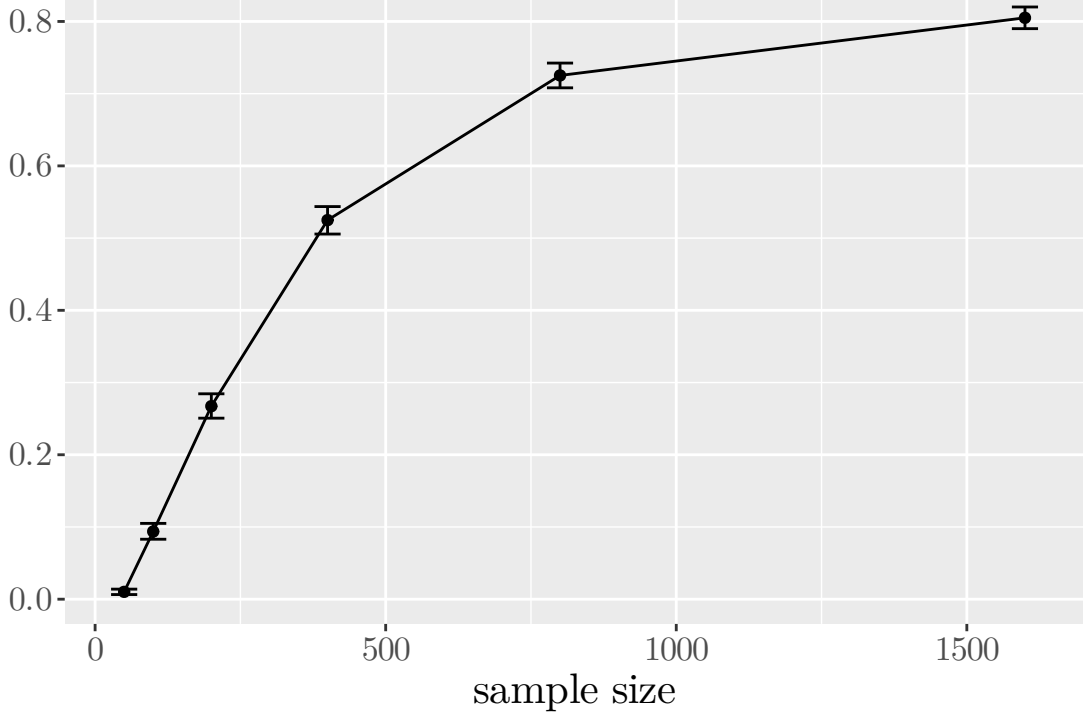

Supplement: supplementary_material [file attachment]

OLS-sparse oracle-|PA| oracle-PA spaceIV

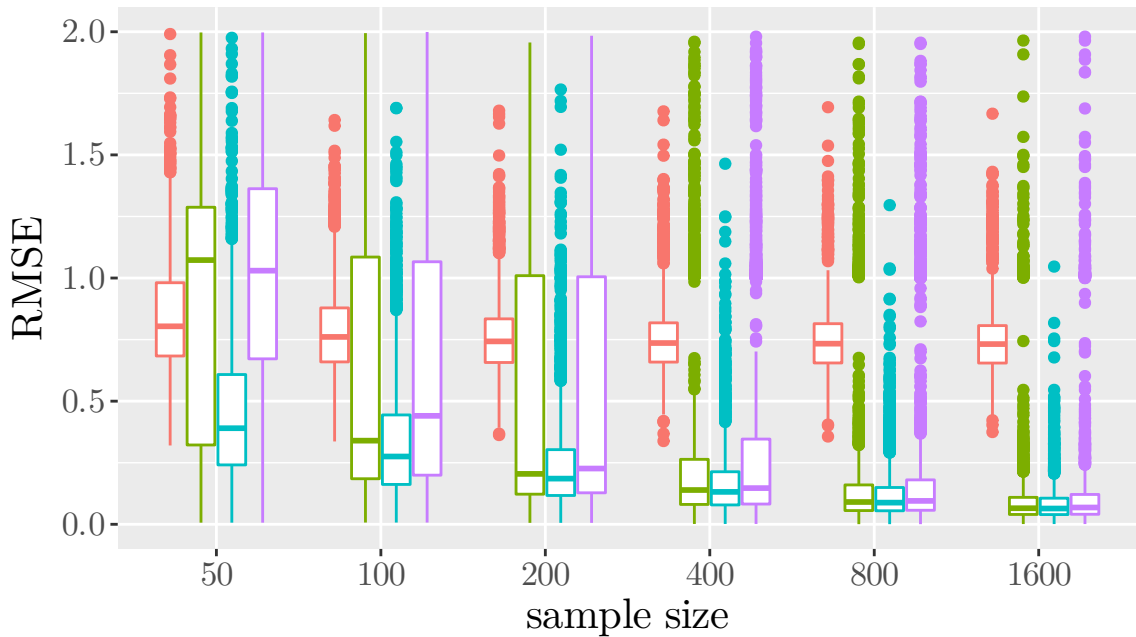

Supplement: supplementary_material [file attachment]

est. prob. sparsity correct

0.4

0.6

0.8

0

500

1000

1500

sample size

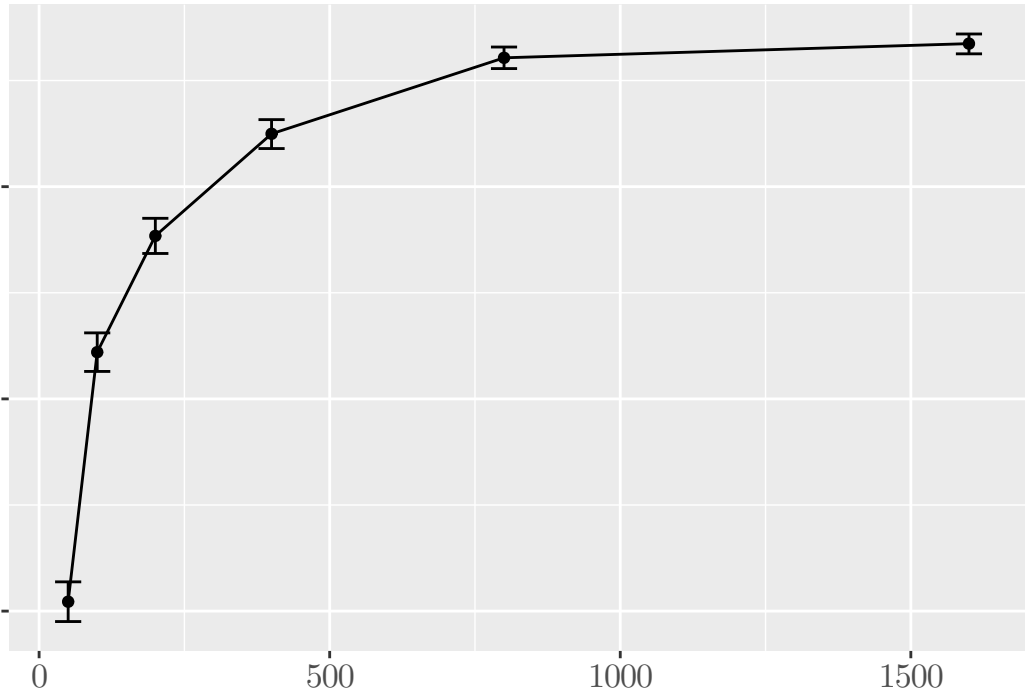

Supplement: supplementary_material [file attachment]

OLS-sparse   oracle-|PA|   oracle-PA   spaceIV

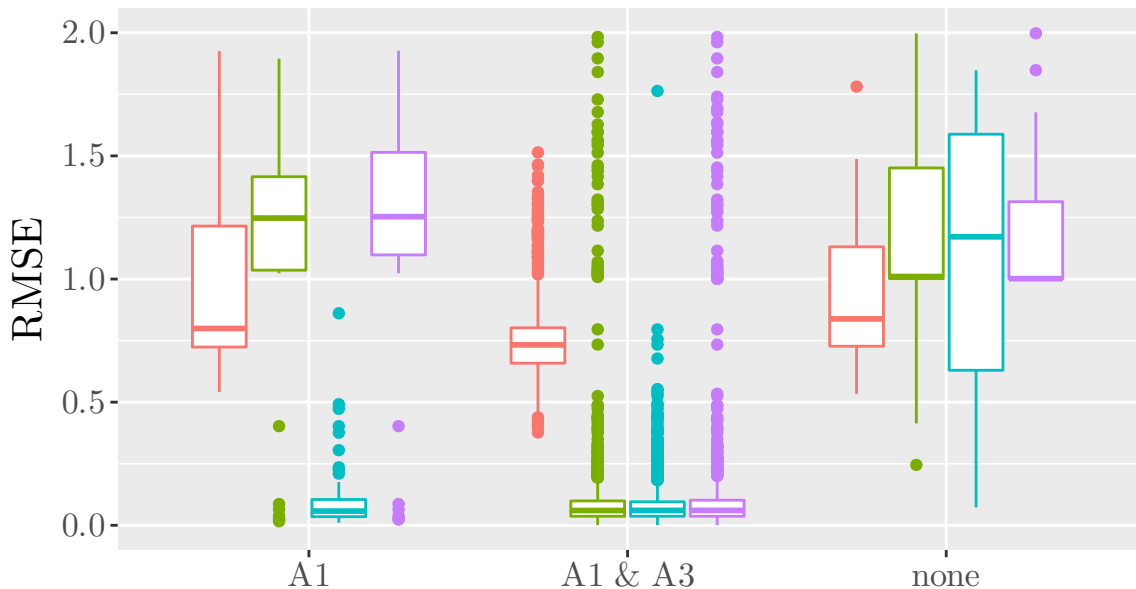

Supplement: supplementary_material [file attachment]

OLS-sparse   oracle- $|\text{PA}|$    oracle-PA   spaceIV

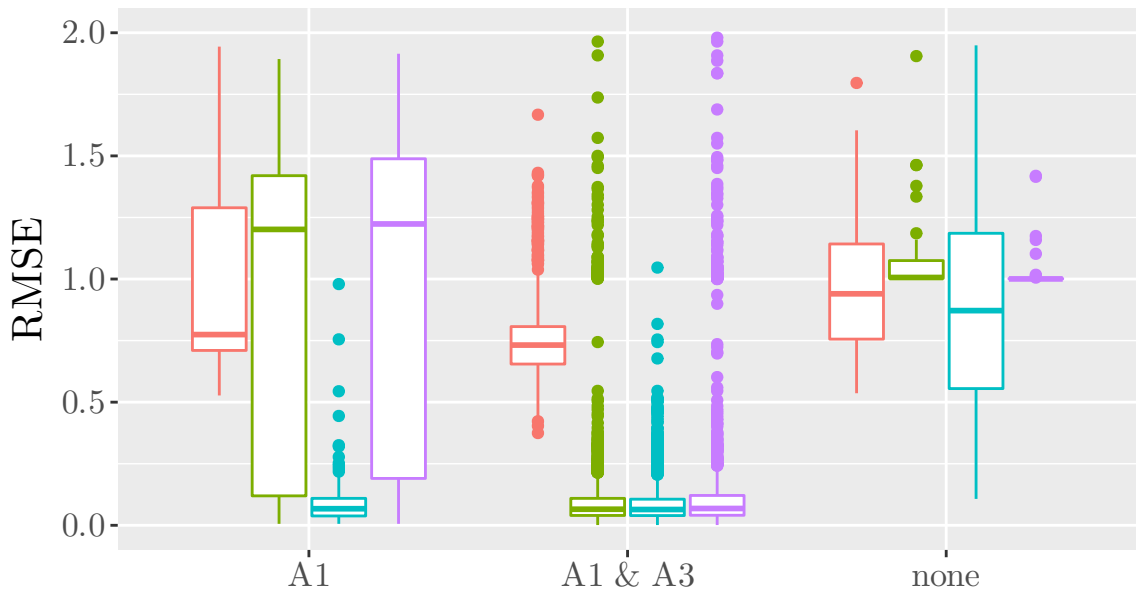

Supplement: supplementary_material [file attachment]
